# Supplementary material for: Copper(ii) and cobalt(ii) coordination polymers with bridging 1,2,4,5-benzenetetracarboxylate and N-methylimidazole: coordination number-determined sheet topology
Source: Royal Society of Chemistry journal article supplement (doi:10.1039/b207559h), 2002-01-01
Supplement: b207559h.pdf [file b207559h.pdf]

**Copper(II) and Cobalt(II) Coordination Polymers with Bridging  
1,2,4,5-Benzenetetracarboxylate and *N*-Methylimidazole:  
Coordination Number-Determined Sheet Topology**

Deping Cheng, Masood A. Khan, and Robert P. Houser\*

*Department of Chemistry & Biochemistry, University of Oklahoma, 620 Parrington Oval,  
Norman, OK 73019, USA. Fax: 405 325 6111; Tel: 405 325 3551; E-mail: houser@ou.edu*

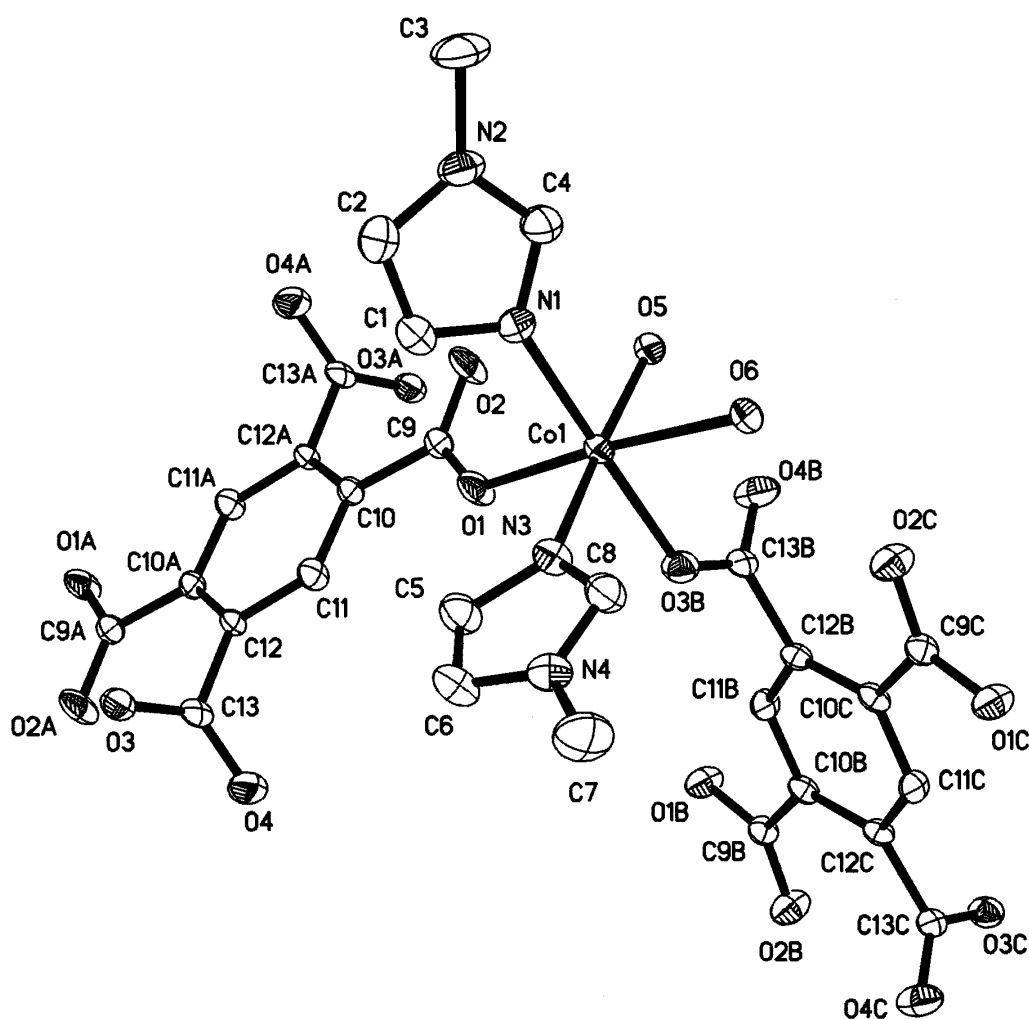

**Figure S1.** Fully labeled representation of a portion of coordination polymer **1**, 50% thermal ellipsoids, non-coordinating solvent water molecules and hydrogen atoms omitted for clarity.

Sample: CO1MEIM (1,2,4,5-BTC)

Size: 4.7620 mg

Method: RAMP

Comment: 25ML/MIN HE, RAMP @ 5C/MIN TO 500C

TGA

File: CO1MEIM.01

Operator: GZ

Run Date: 27-Jun-81 16:01

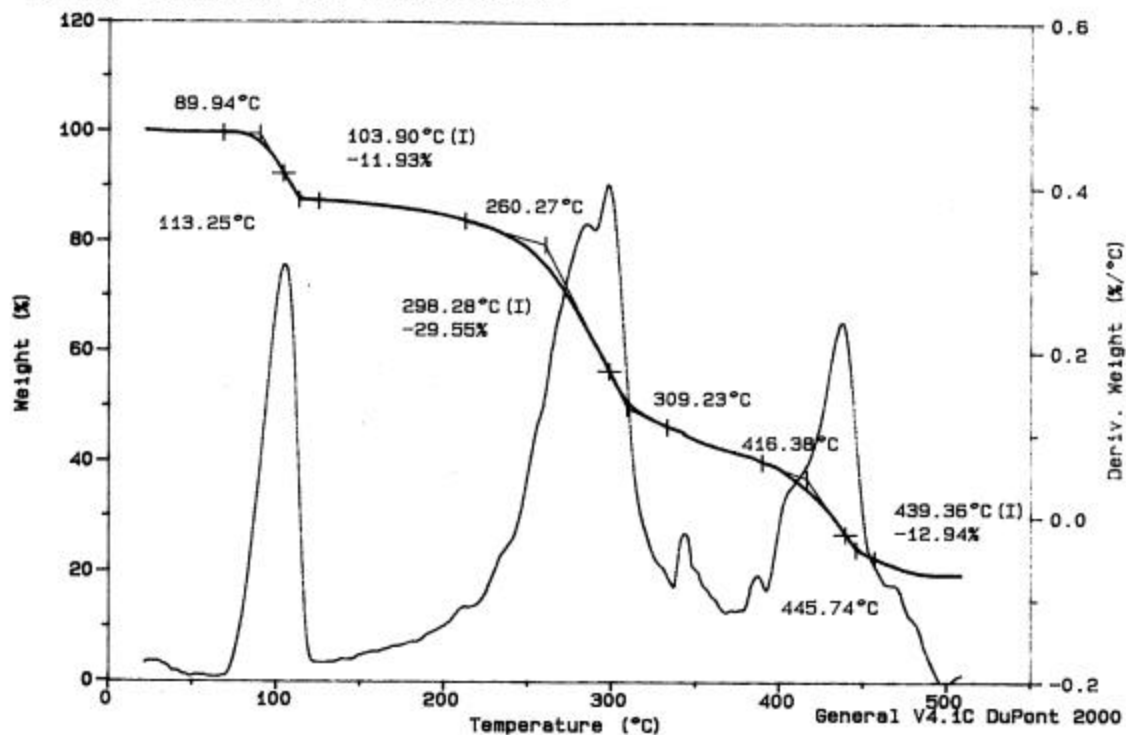

Figure S2. TGA of coordination polymer 1.

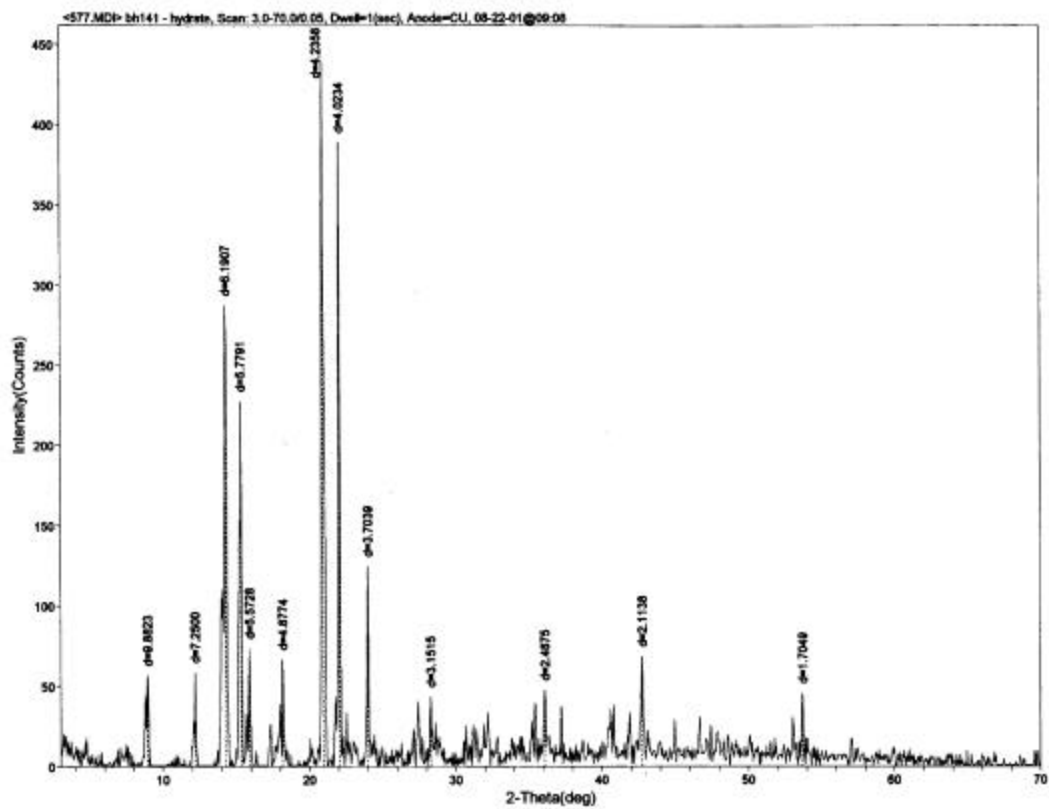

**Figure S3.** Powder X-ray diffraction pattern of coordination polymer **1**.

Sample: BHL141  
Size: 11.7180 mg  
Method: RAMP  
Comment: FLOW 25 ML/MIN HE; RAMP 50/MIN TO 550

TGA

File: BHL141.01  
Operator: GC  
Run Date: 21-Aug-91 12:17

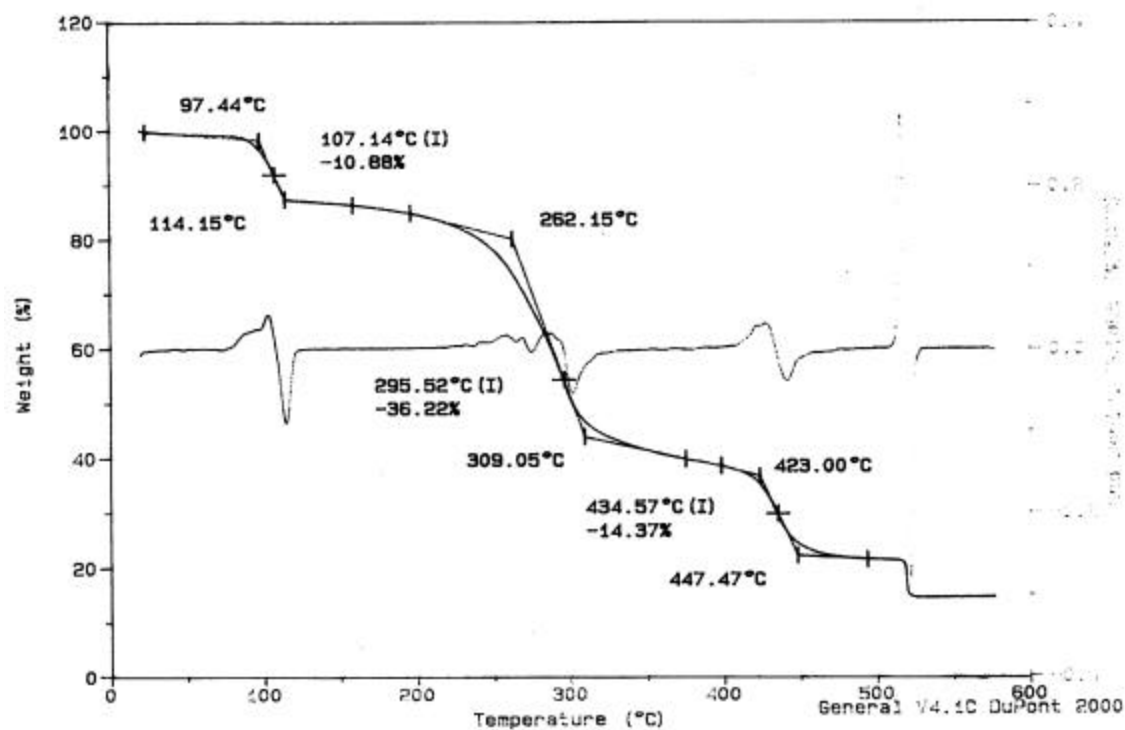

Figure S4. TGA of coordination polymer **1** after drying in a dessicator for 48h.

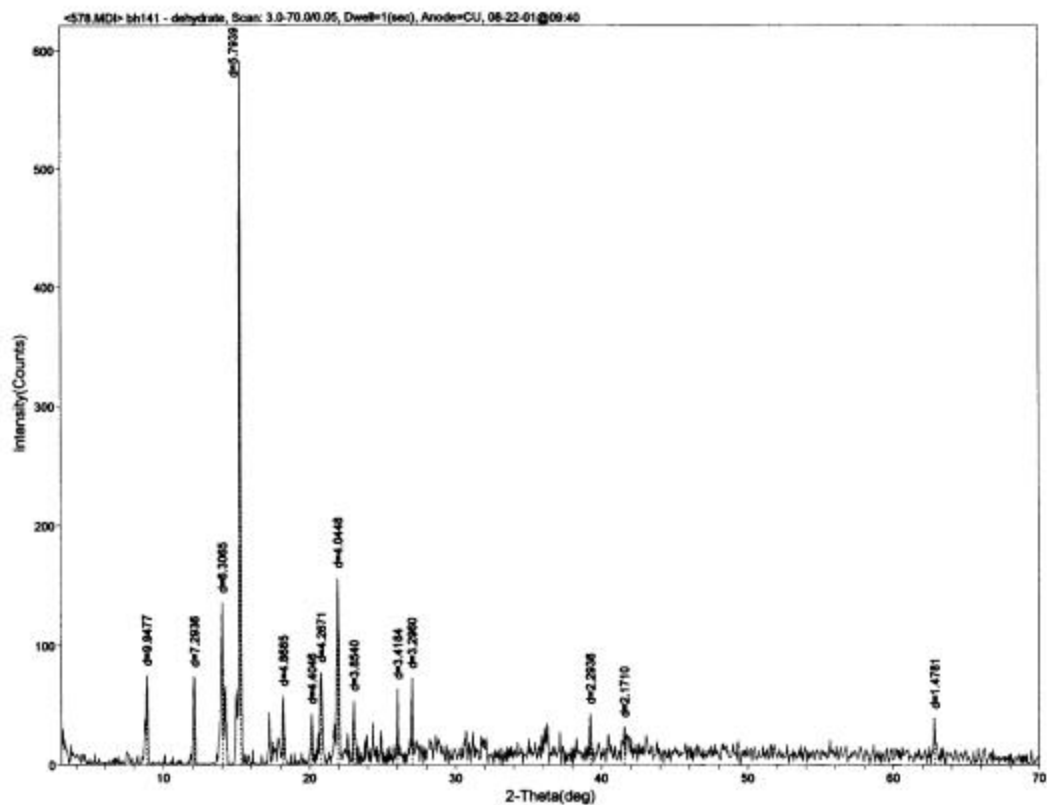

Univ. Oklahoma

c:\data\scn\data-00\ Wednesday, Aug 22, 2001 @ 09:40

**Figure S5.** Powder X-ray diffraction pattern of **1** after drying in a dessicator for 48h.

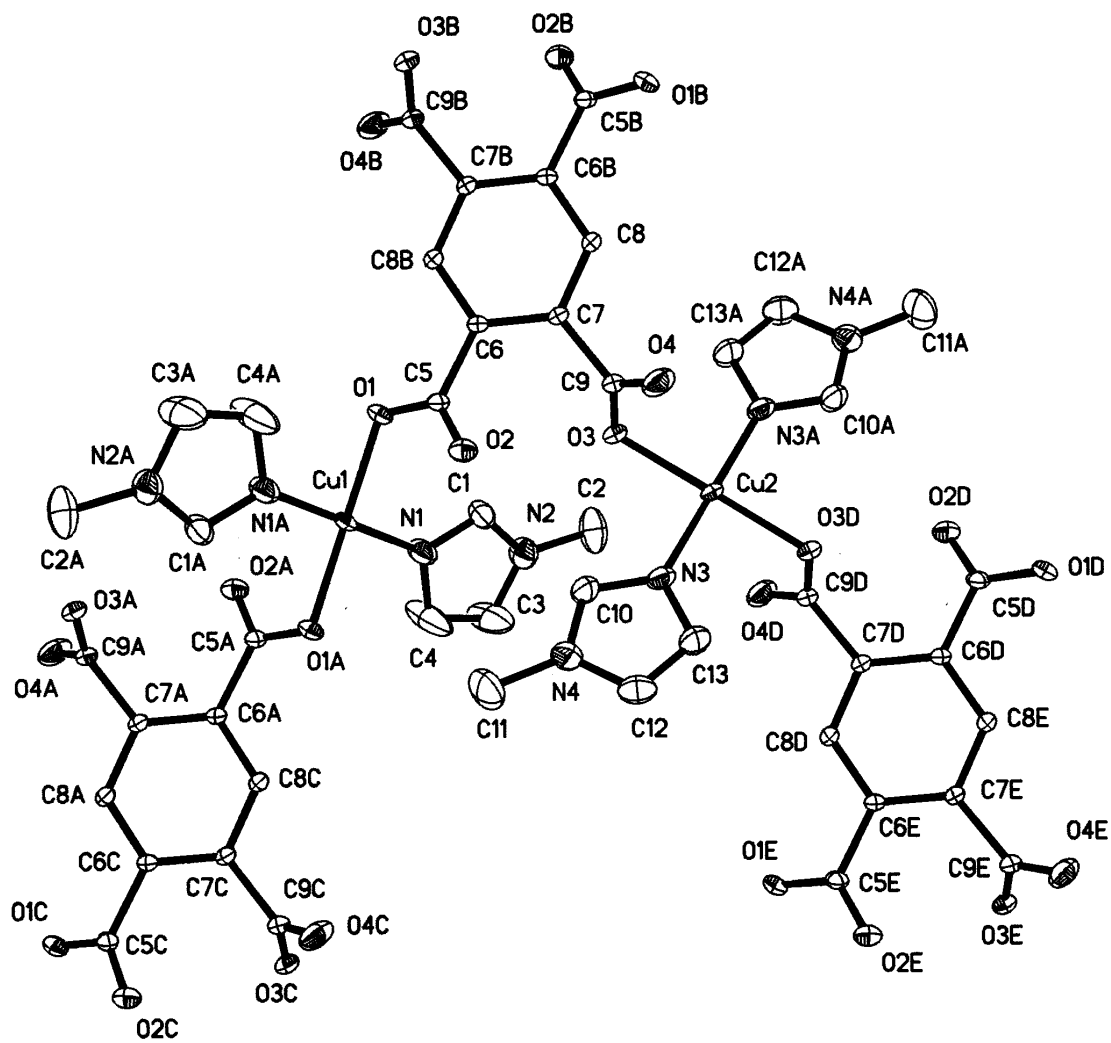

**Figure S6.** Fully labeled representation of a portion of coordination polymer **2**, 50% thermal ellipsoids, hydrogen atoms omitted for clarity.

Sample: CU 1ME IM (1,2,4,5-BTC)

Size: 2.2180 mg

Method: RAMP

Comment: 25ML/MIN HE, RAMP @ 5C/MIN TO 500C

TGA

File: CUMEIM.01

Operator: NDH

Run Date: 27-Jun-91 11:46

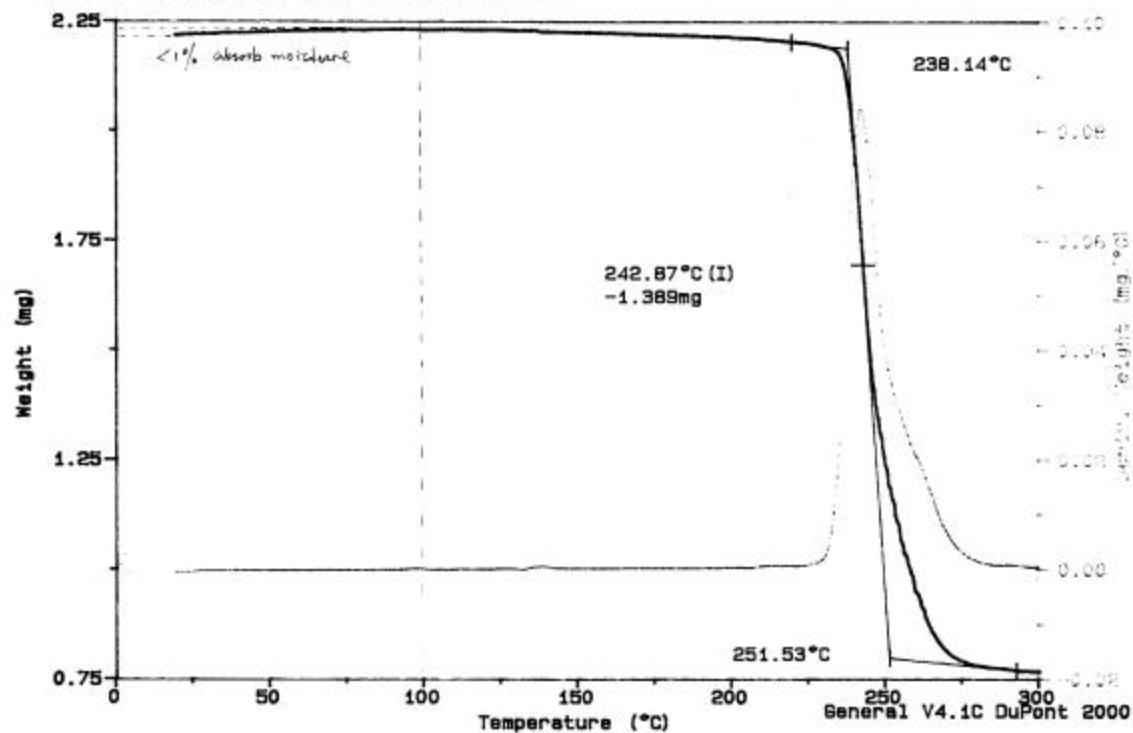

Figure S7. TGA of coordination polymer 2.

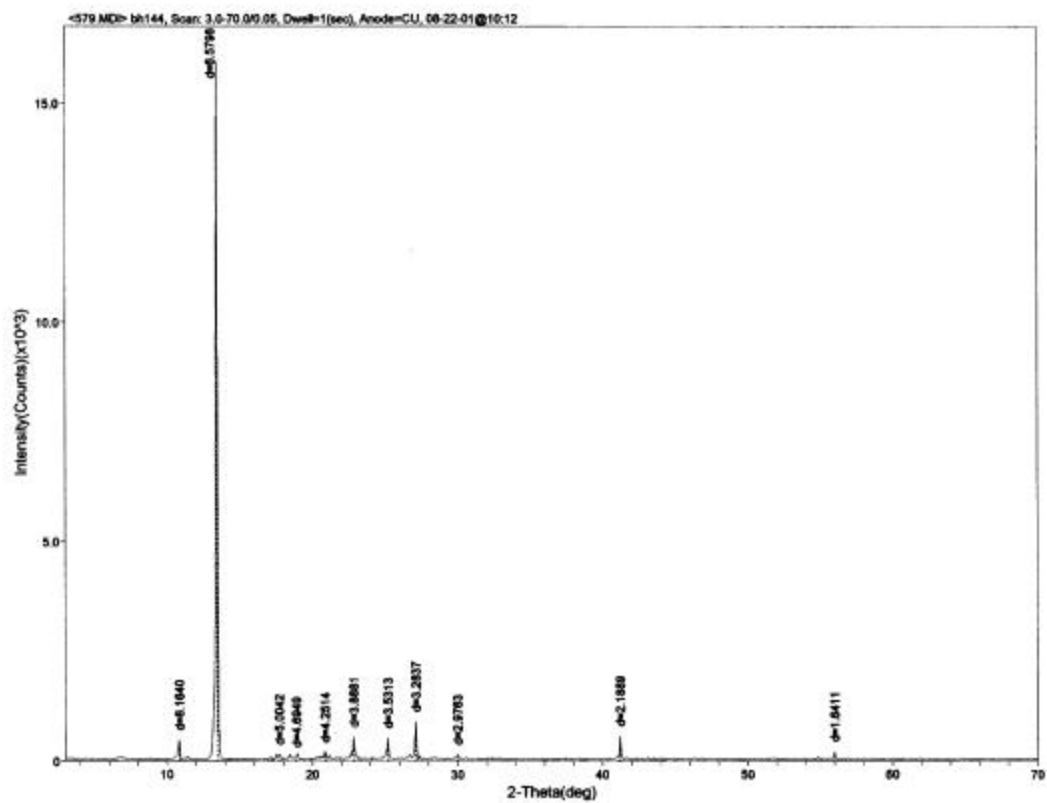

Univ. Oklahoma

<:\\datacenter\data-00> Wednesday, Aug 22, 2001 @10:12a

**Figure S8.** Powder X-ray diffraction pattern of coordination polymer **2**.
